# Supplementary material for: Positively selected modifications in the pore of TbAQP2 allow pentamidine to enter Trypanosoma brucei
Source: eLife. 2020 Aug 11;9:e56416. doi: 10.7554/eLife.56416 (PMC7473772; doi:10.7554/eLife.56416)
Supplement: Figure 2—source data 1. [file elife-56416-fig2-data1.xlsx]

## Sheet: Fig. 2A
	Values in pmol/10E7 cells/s
	exp
	AQP038	AQP039	AQP040	AQP041	AVG	SEM	n
+AQP2-WT	0.0212	0.02559	0.05828	0.04615	0.037805	0.00872638	4		ttest VS
AQP2/3-dKO	0.0001045	0.0001529	0.0001563	8.02e-05	0.000123475	1.8655e-05	4		KO AQP2/3	+ AQP2 W.T
I110W	0.0001057	0.0003912	0.0002931	7.463e-05	0.000216158	7.57138e-05	4		0.279514	0.00505212
	values are percent of +AQP2-WT
	exp
	AQP038	AQP039	AQP040	AQP041	AVG	SEM	n
+AQP2-WT	100	100	100	100	100	0	4		ttest VS
AQP2/3-dKO	0.492925	0.597499	0.268188	0.173781	0.383098	0.0979147	4		KO AQP2/3	+ AQP2 W.T
I110W	0.498585	1.52872	0.502917	0.161712	0.672984	0.29623	4		0.388667	4.74909e-14
	Values in pmol/10E7 cells/s
	exp
	AQP001	AQP002	AQP003	AQP004	AQP016	AQP017	AQP018	AQP023	AVG	SEM	n	ttest vs WT
+AQP2-WT	0.00495	0.01332	0.004133	0.004839	0.04335	0.01646	0.01277	0.03905	0.017359	0.00546069	8
AQP2/3-dKO	4.66e-05	0.000261	6.595e-06	3.355e-06	0.0006005	0.0002457	0.0001777	0.0004007	0.000217769	7.36871e-05	8	0.0072522
AQP2 mutants
L258Y	0.000373	0.0005271	0.000205	0.0004849					0.0003975	7.19325e-05	4	0.0258232
L264R					0.0001845	0.0002432	0.0002031	6.022e-05	0.000172755	3.94603e-05	4	0.0117344
S131P/S263A					0.001495	0.0006151	0.0008373	0.001512	0.00111485	0.000228952	4	0.0136218
	values are percent of +AQP2-WT
	exp
	AQP001	AQP002	AQP003	AQP004	AQP016	AQP017	AQP018	AQP023	AVG	SEM	n	ttest vs 2/3 dKO
+AQP2-WT	100	100	100	100	100	100	100	100	100	0	8
AQP2/3-dKO	0.941414	1.95946	0.159569	0.0693325	1.38524	1.49271	1.39154	1.02612	1.05317	0.232187	8
AQP2 mutants											0
L258Y	7.53535	3.95721	4.96008	10.0207					6.61833	1.36162	4	0.00650456
L264R					0.425606	1.47752	1.59045	0.154213	0.911946	0.364111	4	0.317847
S131P/S263A					3.44867	3.73694	6.55677	3.87196	4.40359	0.723137	4	0.00558084

## Sheet: Fig. 2B
S131P/S263A - Ec50 values
Values as percent of AQP2 /3 null EC50 values										Values as percent of AQP2 /3 null EC50 values														Values as percent of AQP2 /3 null EC50 values									Values as percent of AQP2 /3 null EC50 values
Pentamidine	Repeat 1	Repeat 2	Repeat 3	Repeat 4	Repeat 5	MEAN	SEM	n		Diminazene	Repeat 1	Repeat 2	Repeat 3	Repeat 4	Repeat 5	Repeat 6	Repeat 7	Repeat 8	Repeat 9	MEAN	SEM	n		Cymelarsan	Repeat 1	Repeat 2	Repeat 3	Repeat 4	MEAN	SEM	n		PAO	Repeat 1	Repeat 2	Repeat 3	Repeat 4	Repeat 5	Repeat 6	Repeat 7	Repeat 8	Repeat 9	MEAN	SEM	n
dKO AQP2/3	100	100	100	100	100	100	0	5		dKO AQP2/3	100	100	100	100	100	100	100	100	100	100	0	9		dKO AQP2/3	100	100	100	100	100	0	4		dKO AQP2/3	100	100	100	100	100	100	100	100	100	100	0	9
+AQP2	0.0304348	0.0836829	0.162524	0.0507559	0.0786963	0.0812188	0.0225055	5		+AQP2	73.4564	59.6888	91.5793	107.861	87.5666	60.4151	142.868	93.8438	153.488	96.7519	11.0713	9		+AQP2	11.9866	12.136	10.3175	12.8378	11.8195	0.533949	4		+AQP2	71.2738	95.8266	73.0755	63.0247	128.778	97.1663	100	101.575	105.426	92.9052	6.82096	9
S131P/S263A	0.263171	2.86957	3.09551	0.241901	3.1399	1.92201	0.683109	5		S131P/S263A	132.678	97.8639	86.7271	77.4318	45.9444	56.8736	126.617	73.2232	143.93	93.4766	11.494	9		S131P/S263A	58.6337	53.6745	50.9259	69.9324	58.2916	4.19521	4		S131P/S263A	119.32	59.4478	100.331	66.9461	99.7127	103.505	98.5294	97.6378	107.752	94.7979	6.39774	9

## Sheet: Fig. 2C
L258Y - EC50 values
Values as percent of AQP2 /3 null EC50 values
Pentamidine	Repeat 1	Repeat 2	Repeat 3	Repeat 4	Repeat 5	Repeat 6	MEAN	SEM	n		Diminazene	Repeat 1	Repeat 2	Repeat 3	Repeat 4	Repeat 5	MEAN	SEM	n		Cymelarsan	Repeat 1	Repeat 2	Repeat 3	Repeat 4	Repeat 5	Repeat 6	MEAN	SEM	n		PAO	Repeat 1	Repeat 2	Repeat 3	Repeat 4	Repeat 5	Repeat 6	MEAN	SEM	n
dKO AQP2/3	100	100	100	100	100	100	100	0	6		dKO AQP2/3	100	100	100	100	100	100	0	5		dKO AQP2/3	100	100	100	100	100	100	100	0	6		dKO AQP2/3	100	100	100	100	100	100	100	0	6
+AQP2	0.155623	0.0801699	0.0434525	0.111975	0.0304348	0.0836829	0.0842229	0.0186549	6		+AQP2	125.779	111.105	126.247	87.5666	60.4151	102.223	12.5969	5		+AQP2	19.3868	8.01155	13.5414	11.9979	11.9866	12.136	12.8434	1.51217	6		+AQP2	121.792	67.4937	122.411	69.5162	128.778	97.1663	101.193	11.2409	6
L258Y	0.712562	0.367897	0.418235	0.246769	0.0487468	1.21509	0.50155	0.168168	6		L258Y	148.147	58.6003	114.891	165.366	41.4509	105.691	24.2822	5		L258Y	41.3174	31.8922	24.2624	21.6981	37.8877	41.8956	33.1589	3.54662	6		L258Y	143.077	71.2473	73.8439	64.7823	90.5446	102.163	90.943	11.8444	6

## Sheet: Fig. 2D
I110W - EC50 values
Values as percent of AQP2 /3 null EC50 values
Pentamidine	Repeat 1	Repeat 2	Repeat 3	Repeat 4	Repeat 5	Repeat 6	Repeat 7	Repeat 8	Repeat 9	Repeat 10	Repeat 11	MEAN	SEM	n		Diminazene	Repeat 1	Repeat 2	Repeat 3	Repeat 4	Repeat 5	Repeat 6	Repeat 7	Repeat 8	Repeat 9	Repeat 10	Repeat 11	Repeat 12	Repeat 13	MEAN	SEM	n		Cymelarsan	Repeat 1	Repeat 2	Repeat 3	Repeat 4	Repeat 5	Repeat 6	Repeat 7	Repeat 8	Repeat 9	Repeat 10	Repeat 11	Repeat 12	MEAN	SEM	n
dKO AQP2/3	100	100	100	100	100	100	100	100	100	100	100	100	0	11		dKO AQP2/3	100	100	100	100	100	100	100	100	100	100	100	100	100	100	0	13		dKO AQP2/3	100	100	100	100	100	100	100	100	100	100	100	100	100	0	12
+AQP2	2.56455	3.02515	1.46475	0.219945	0.930772	1.09012	0.385547	0.101779	0.167885	2.71673	2.70601	1.39757	0.348793	11		+AQP2	79.2777	128.131	138.388	139.337	87.8139	87.5666	60.4151							102.99	12.0013	7		+AQP2	12.2992	8.06141	12.6087	14.7818	19.1436	47.929	12.3707	28.704	19.0797	13.5764	11.9866	12.136	17.7231	3.14351	12
I110W	126.348	120.62	139.131	61.8574	158.018	127.358	105.943	78.4187	136.104	156.752	132.839	122.126	9.01438	11		I110W	122.752	117.068	131.561	64.4184	146.98	104.889	104.435	154.063	130.238	107.045	121.418	86.7289	98.8957	114.653	6.7241	13		I110W	112.443	153.346	101.442	102.545	100.888	103.381	66.1741	105.882	100.536	74.0101	146.605	112.431	106.64	7.11026	12

## Sheet: Fig. 2E
L264R - EC50 values
Values as percent of AQP2 /3 null EC50 values
Pentamidine	Repeat 1	Repeat 2	Repeat 3	Repeat 4	MEAN	SEM	n		Diminazene	Repeat 1	Repeat 2	Repeat 3	Repeat 4	Repeat 5	MEAN	SEM	n		Cymelarsan	Repeat 1	Repeat 2	Repeat 3	Repeat 4	Repeat 5	Repeat 6	Repeat 7	MEAN	SEM	n		PAO	Repeat 1	Repeat 2	Repeat 3	Repeat 4	Repeat 5	Repeat 6	MEAN	SEM	n
dKO AQP2/3	100	100	100	100	100	0	4		dKO AQP2/3	100	100	100	100	100	100	0	5		dKO AQP2/3	100	100	100	100	100	100	100	100	0	7		dKO AQP2/3	100	100	100	100	100	100	100	0	6
+AQP2	0.151345	0.0546038	0.403236	0.0304348	0.159905	0.0852125	4		+AQP2	73.4564	59.6888	91.5793	107.861	60.4151	78.6001	9.32587	5		+AQP2	19.3868	12.9141	10.6222	13.6176	13.0283	11.9866	12.136	13.3845	1.06429	7		+AQP2	71.2738	95.8266	73.0755	63.0247	128.778	97.1663	88.1909	9.88974	6
L264R	110.034	117.925	151.931	126.445	126.584	9.08935	4		L264R	109.878	101.021	76.3795	59.1042	150.381	99.3526	15.5967	5		L264R	111.18	106.562	90.1491	84.632	74.3646	124.392	106.044	99.6177	6.52638	7		L264R	116.405	82.667	120.644	66.531	101.524	102.908	98.4466	8.39091	6

## Sheet: Fig. 2F
I110W/L264R - EC50 values
Values as percent of AQP2 /3 null EC50 values
Pentamidine	Repeat 1	Repeat 2	Repeat 3	Repeat 4	Repeat 5	Repeat 6	Repeat 7	Repeat 8	Repeat 9	Repeat 10	Repeat 11	MEAN	SEM	n		Diminazene	Repeat 1	Repeat 2	Repeat 3	Repeat 4	Repeat 5	Repeat 6	Repeat 7	Repeat 8	Repeat 9	Repeat 10	Repeat 11	MEAN	SEM	n		Diminazene	Repeat 1	Repeat 2	Repeat 3	Repeat 4	Repeat 5	Repeat 6	Repeat 7	Repeat 8	Repeat 9	Repeat 10	Repeat 11	MEAN	SEM	n		PAO	Repeat 1
dKO AQP2/3	100	100	100	100	100	100	100	100	100	100	100	100	0	11		dKO AQP2/3	100	100	100	100	100	100	100	100	100	100	100	100	0	11		dKO AQP2/3	100	100	100	100	100	100	100	100	100	100	100	100	0	11		dKO AQP2/3	100
+AQP2	3.02515	1.46475	0.219945	0.930772	1.09012	0.385547	0.101779	0.217587	0.105112	0.0304348	0.0836829	0.695898	0.274663	11		+AQP2	79.2777	128.131	138.388	139.337	87.8139	87.5666	60.4151					102.99	12.0013	7		+AQP2	79.2777	128.131	138.388	139.337	87.8139	87.5666	60.4151					102.99	12.0013	7		+AQP2	160.294
I110W/L264R	110.562	100.464	61.3639	144.785	133.019	112.179	36.6337	146.104	74.6421	97.7238	98.0307	101.41	10.2779	11		I110W/L264R	137.676	95.6945	102.887	76.379	134.061	120.97	63.0387	125.109	100.131	140.175	93.5453	108.152	7.7022	11		I110W/L264R	137.676	95.6945	102.887	76.379	134.061	120.97	63.0387	125.109	100.131	140.175	93.5453	108.152	7.7022	11		I110W/L264R	154.412
[truncated: 12 more columns]

## Sheet: Fig. 2G
Pentamidine transport rates in TbAQP3 mutants, expressed as percent of TbAQP2WT control
AQP3 mutants	Performed over 30 minutes
	AQP024	AQP025	AQP026	AVG	SEM	n	%	ttest vs dKO
+AQP2WT				0.0212216	0.00342413	18	100
AQP3/3 dKO	0.0001081	0.0001119	0.0001453	0.000121767	1.18177e-05	3	0.573788
+AQP3-WT	6.716e-05	0.0001054	0.0001405	0.000104353	2.11779e-05	3	0.491733	0.51245
W102I/R256L	9.783e-05	0.0001283	0.0002274	0.000151177	3.91135e-05	3	0.712373	0.511474
W102I/R256L/Y250L	0.0002302	0.0002154	0.0002931	0.000246233	2.38196e-05	3	1.1603	0.00944108
+AQP2WT				100	0
AQP3/3 dKO	0.509388	0.527294	0.684681	0.573788	0.0556872
+AQP3-WT	0.316471	0.496665	0.662063	0.491733	0.0997943
W102I/R256L	0.460994	0.604574	1.07155	0.712373	0.18431
W102I/R256L/Y250L	1.08475	1.01501	1.38114	1.1603	0.112243
pmol/10E7 cells/s
	exp
	AQP001	AQP002	AQP003	AQP004	AQP006	AQP007	AQP008	AQP009	AQP010	AQP011	AQP012	AQP013	AQP014	AQP015	AQP016	AQP017	AQP018	AQP023	AVG	SEM	n
+AQP2-WT	0.00495	0.01332	0.004133	0.004839	0.0402	0.02718	0.02059	0.02367	0.04246	0.02929	0.03811	0.005972	0.009128	0.006516	0.04335	0.01646	0.01277	0.03905	0.0212216	0.00342413	18

## Sheet: Fig. 2H
AQP3 mutants -EC50 vlues, expresed as % of aqp2/aqp3 null
Values as percent of AQP2 /3 null EC50 values																			Pentamidine
Pentamidine	Repeat 1	Repeat 2	Repeat 3	Repeat 4	Repeat 5	Repeat 6	Repeat 7	Repeat 8	MEAN	SEM	n
dKO AQP2/3	100	100	100	100	100	100	100	100	100	0	8
+AQP2	3.02515	1.46475	0.219945	0.930772	1.09012	2.71673	2.70601	0.0304348	1.52299	0.41292	8
AQP3-WT	60.4694	115.631	77.5874	144.228	124.379	117.076	132.322	73.9386	105.704	10.8685	8
Pentamidine	Repeat 1	Repeat 2	Repeat 3	Repeat 4	Repeat 5	Repeat 6	Repeat 7	Repeat 8	Repeat 9	Repeat 10	Repeat 11	Repeat 12	Repeat 13	Repeat 14	MEAN	SEM	n
dKO AQP2/3	100	100	100	100	100	100	100	100	100	100	100	100	100	100	100	0	14
+AQP2	2.56455	3.02515	1.46475	0.219945	0.930772	1.09012	0.385547	0.101779	0.105112	0.167885	2.71673	2.70601	0.0304348	0.0836829	1.11375	0.310266	14
AQP3 W102I/R256L	112.524	88.2649	92.8881	61.5696	124.684	118.297	78.0998	69.967	68.4867	42.3572	85.6653	78.977	106.317	45.4987	83.8283	6.81787	14
Pentamidine	Repeat 1	Repeat 2	Repeat 3	Repeat 4	Repeat 5	Repeat 6	Repeat 7	Repeat 8	Repeat 9	Repeat 10	Repeat 11	Repeat 12	Repeat 13	Repeat 14	MEAN	SEM	n
dKO AQP2/3	100	100	100	100	100	100	100	100	100	100	100	100	100	100	100	0	14
+AQP2	2.56455	3.02515	1.46475	0.219945	0.930772	1.09012	0.539073	0.743443	0.678989	0.269822	2.71673	2.70601	0.0304348	0.0836829	1.21882	0.289637	14
AQP3 W102I/Y250L/R256L	42.4205	34.9874	31.0142	28.9171	56.7929	59.1112	15.1107	11.5689	26.425	16.5597	35.0942	33.0748	34.8849	21.1841	31.939	3.76934	14
Values as percent of AQP2 /3 null EC50 values																			PAO
PAO	Repeat 1	Repeat 2	Repeat 3	Repeat 4	Repeat 5	MEAN	SEM	n
dKO AQP2/3	100	100	100	100	100	100	0	5
+AQP2	90.3704	92.253	96.8153	101.237	100.072	96.1496	2.12481	5
AQP3-WT	81.9136	81.6982	95.3594	100.946	98.9177	91.767	4.16392	5
PAO	Repeat 1	Repeat 2	Repeat 3	Repeat 4	Repeat 5	Repeat 6	Repeat 7	Repeat 8	Repeat 9	Repeat 10	Repeat 11	Repeat 12	MEAN	SEM	n
dKO AQP2/3	100	100	100	100	100	100	100	100	100	100	100	100	100	0	12
+AQP2	160.294	90.3704	92.253	96.8153	101.237	100.072	87.4241	85.8547	128.778	97.1663			104.027	7.32738	10
AQP3 W102I/R256L	223.529	100.679	102.977	92.9633	99.7817	101.227	76.7287	82.9009	94.9654	45.4348	99.2131	50.0671	97.5389	12.7855	12
PAO	Repeat 1	Repeat 2	Repeat 3	Repeat 4	Repeat 5	Repeat 6	Repeat 7	Repeat 8	Repeat 9	Repeat 10	Repeat 11	Repeat 12	MEAN	SEM	n
dKO AQP2/3	100	100	100	100	100	100	100	100	100	100	100	100	100	0	12
+AQP2	160.294	90.3704	92.253	96.8153	101.237	100.072	87.4241	85.8547	128.778	97.1663			104.027	7.32738	10
AQP3 W102I/Y250L/R256L	121.324	80.5556	88.5656	105.065	102.62	100.505	100.508	101.719	99.6593	109.634	102.698	103.579	101.369	2.87364	12
