# Supplementary material for: Positively selected modifications in the pore of TbAQP2 allow pentamidine to enter Trypanosoma brucei
Source: eLife. 2020 Aug 11;9:e56416. doi: 10.7554/eLife.56416 (PMC7473772; doi:10.7554/eLife.56416)
Supplement: Figure 3—source data 1. [file elife-56416-fig3-data1.xlsx]

## Sheet: Fig. 3A
Pentamidine transport rates
	Values in pmol/10E7 cells/s
																									Values in pmol/10E7 cells/s
	exp																								exp
	AQP001	AQP002	AQP003	AQP004	AQP006	AQP007	AQP008	AQP009	AQP010	AQP011	AQP012	AQP013	AQP014	AQP015	AQP016	AQP017	AQP018	AQP023	AVG	SEM	n	ttest vs WT			AQP038	AQP039	AQP040	AQP041	AVG	SEM	n	ttest vs WT
+AQP2-WT	0.00495	0.01332	0.004133	0.004839	0.0402	0.02718	0.02059	0.02367	0.04246	0.02929	0.03811	0.005972	0.009128	0.006516	0.04335	0.01646	0.01277	0.03905	0.0212216	0.00342413	18			+AQP2-WT	0.0212	0.02559	0.05828	0.04615	0.037805	0.00872638	4
AQP2/3-dKO	4.66e-05	0.000261	6.595e-06	3.355e-06	0.0006115	0.0001785	0.000301	ND	0.0003271	0.0005043	0.0003812	ND	7.4e-05	5.783e-05	0.0006005	0.0002457	0.0001777	0.0004007	0.000276427	5.52336e-05	16			AQP2/3-dKO	0.0001045	0.0001529	0.0001563	8.02e-05	0.000123475	1.8655e-05	4
AQP2 mutants																								AQP2 mutants
I190T/W192G															0.000811	0.0007641	0.0004785	0.0002102	0.00056595	0.000139499	4	0.0124832		I190T	0.0007167	0.001156	0.0009528	0.0006372	0.000865675	0.000117712	4	0.0054839
	as percentage of AQP2WT control
	values are percent of +AQP2-WT																								values are percent of +AQP2-WT
	exp																					ttest VS			exp							ttest VS
	AQP001	AQP002	AQP003	AQP004	AQP006	AQP007	AQP008	AQP009	AQP010	AQP011	AQP012	AQP013	AQP014	AQP015	AQP016	AQP017	AQP018	AQP023	AVG	SEM	n	KO AQP2/3			AQP038	AQP039	AQP040	AQP041	AVG	SEM	n	KO AQP2/3
+AQP2-WT	100	100	100	100	100	100	100	100	100	100	100	100	100	100	100	100	100	100	100	0	18			+AQP2-WT	100	100	100	100	100	0	4
AQP2/3-dKO															1.38524	1.49271	1.39154	1.02612	1.3239	0.102269	4			AQP2/3-dKO	0.492925	0.597499	0.268188	0.173781	0.383098	0.0979147	4
AQP2 mutants																								AQP2 mutants
I190T/W192G															1.87082	4.64216	3.74706	0.538284	2.69958	0.923259	4	0.189118		I190T	3.38066	4.51739	1.63487	1.38072	2.72841	0.743752	4	0.0204186

## Sheet: Fig. 3B
EC50 values for mutant TbAQP2(I190T)
Values as percent of AQP2 /3 null EC50 values											Values as percent of AQP2 /3 null EC50 values													Values as percent of AQP2 /3 null EC50 values
Pentamidine	Repeat 1	Repeat 2	Repeat 3	Repeat 4	Repeat 5	Repeat 6	MEAN	SEM	n		Cymelarsan	Repeat 1	Repeat 2	Repeat 3	Repeat 4	Repeat 5	Repeat 6	Repeat 7	Repeat 8	MEAN	SEM	n		PAO	Repeat 1	Repeat 2	Repeat 3	Repeat 4	Repeat 5	Repeat 6	Repeat 7	Repeat 8	Repeat 9	MEAN	SEM	n
dKO AQP2/3	100	100	100	100	100	100	100	0	6		dKO AQP2/3	100	100	100	100	100	100	100	100	100	0	8		dKO AQP2/3	100	100	100	100	100	100	100	100	100	100	0	9
+AQP2	0.155623	0.0801699	0.111975	0.0304348	0.0836829	0.0507559	0.0854401	0.0181559	6		+AQP2	19.3868	8.01155	13.5414	11.9979	11.9866	12.136	10.3175	12.8378	12.5269	1.15092	8		+AQP2	121.792	67.4937	122.411	69.5162	128.778	97.1663	101.024	101.575	105.426	101.687	7.2712	9
I190T	1.14591	3.09315	10.8315	4.26087	11.5448	10.4392	6.88588	1.86298	6		I190T	52.5238	37.1264	75.8976	72.4218	79.3881	38.5508	79.6958	81.7568	64.6701	6.69341	8		I190T	89.8208	80.7063	119.849	112.607	94.0545	97.1663	97.7941	108.661	104.651	100.59	4.03211	9

## Sheet: Fig. 3C
EC50 values for mutant TbAQP2(W192G)
Values as percent of AQP2 /3 null EC50 values													Values as percent of AQP2 /3 null EC50 values													Values as percent of AQP2 /3 null EC50 values
Pentamidine	Repeat 1	Repeat 2	Repeat 3	Repeat 4	Repeat 5	Repeat 6	Repeat 7	Repeat 8	MEAN	SEM	n		Cymelarsan	Repeat 1	Repeat 2	Repeat 3	Repeat 4	Repeat 5	Repeat 6	Repeat 7	Repeat 8	MEAN	SEM	n		PAO	Repeat 1	Repeat 2	Repeat 3	Repeat 4	Repeat 5	Repeat 6	Repeat 7	Repeat 8	Repeat 9	MEAN	SEM	n
dKO AQP2/3	100	100	100	100	100	100	100	100	100	0	8		dKO AQP2/3	100	100	100	100	100	100	100	100	100	0	8		dKO AQP2/3	100	100	100	100	100	100	100	100	100	100	0	9
+AQP2	0.155623	0.0801699	0.111975	0.0304348	0.0836829	0.162524	0.0507559	0.0786963	0.0942326	0.0165065	8		+AQP2	19.3868	8.01155	13.5414	11.9979	11.9866	12.136	10.3175	12.8378	12.5269	1.15092	8		+AQP2	121.792	67.4937	122.411	69.5162	128.778	97.1663	101.024	101.575	105.426	101.687	7.2712	9
W192G	3.36149	2.04189	7.69092	3.47826	9.98721	19.7353	6.55148	11.7647	8.07641	2.05047	8		W192G	38.8941	33.6754	48.5349	30.3438	47.7536	38.5508	45.4365	52.8716	42.0076	2.77913	8		W192G	124.619	69.1453	118.79	72.9872	93.5548	98.3594	102.206	103.937	102.326	98.4359	6.11104	9

## Sheet: Fig. 3D
EC50 values of TbAQP2(I190T/W192G)
Values as percent of AQP2 /3 null EC50 values								Values as percent of AQP2 /3 null EC50 values									Values as percent of AQP2 /3 null EC50 values
Pentamidine	Repeat 1	Repeat 2	Repeat 3	MEAN	SEM	n		Cymelarsan	Repeat 1	Repeat 2	Repeat 3	Repeat 4	MEAN	SEM	n		PAO	Repeat 1	Repeat 2	Repeat 3	Repeat 4	Repeat 5	Repeat 6	Repeat 7	Repeat 8	Repeat 9	MEAN	SEM	n
dKO AQP2/3	100	100	100	100	0	3		dKO AQP2/3	100	100	100	100	100	0	4		dKO AQP2/3	100	100	100	100	100	100	100	100	100	100	0	9
+AQP2	0.151345	0.0546038	0.0285431	0.0781641	0.037356	3		+AQP2	12.9141	10.6222	13.6176	13.0283	12.5455	0.659391	4		+AQP2	71.2738	95.8266	73.0755	63.0247	128.778	97.1663	101.024	101.575	105.426	93.0189	6.83668	9
I190T/W192T	131.67	89.434	77.4635	99.5226	16.4411	3		I190T/W192T	104.687	94.6857	84.5691	96.0784	95.0052	4.12222	4		I190T/W192T	120.291	67.1051	72.6074	68.4299	97.4019	85.7569	99.5648	81.1024	67.4419	84.4113	6.10181	9

## Sheet: Figure 3-figure supplement 1
Frame A		Transport of 30 nM [3H]-pentamidine by tbaqp2/tbaqp3 null cells expressing TbAQP2I190T
		Log[Inhibitor]	AVG	SEM
		-9	0.000953	2.11e-05
		-8	0.000802	2.46e-05
		-7.48149	0.000699	2.86e-05
		-7	0.000523	2.38e-05
		-6.48149	0.000475	0
		-6	0.000463	7.19e-06
		-5.48149	0.000461	9.63e-07
		-5	0.000461	5.51e-06
		-4.48149	0.000464	0
		-4	0.000321	4.11e-05
		-3.47756	0.000181	1.11e-05
		-3	5.58e-05	3.27e-06
Frame B		Transport of 30 nM [3H]-pentamidine by tbaqp2/tbaqp3 null cells expressing TbAQP2-WT
		Log[Inhibitor]	AVG	SEM
		-9	0.01854	0.00158
		-8	0.015371	0.001358
		-7.48149	0.013318	0.0016
		-7	0.007268	0.000715
		-6.48149	0.002707	5.34e-05
		-6	0.001247	0.000129
		-5.48149	0.000747	2.46e-05
		-5	0.000479	6.15e-05
		-4.48149	0.000463	7.78e-05
		-4	0.000304	1.6e-05
		-3.47756	0.000232	8.74e-05
		-3	2.03e-20	6.4e-06
