# Supplementary material for: Positively selected modifications in the pore of TbAQP2 allow pentamidine to enter Trypanosoma brucei
Source: eLife. 2020 Aug 11;9:e56416. doi: 10.7554/eLife.56416 (PMC7473772; doi:10.7554/eLife.56416)
Supplement: Figure 4—source data 1. [file elife-56416-fig4-data1.xlsx]

## Sheet: Fig. 4A
Alamar blue EC50 values of mutants expressed in the aqp2/aqp3 null cell line
Pentamidine EC50 values for all mutants in double AQP knockout (aqp2/3 null)
Values in nM						ttest	ttest
Pentamidine	Repeat 1	Repeat 2	Repeat 3	MEAN	SEM	vs dKO 2/3	vs AQP2WT
dKO AQP2/3	77.5	68.9	70.45	72.2833	2.64643	1	1.17065e-05
+AQP2	1.765	1.539	1.517	1.607	0.0792549	1.17065e-05	1
+L84W	34.5	33.59	27.84	31.9767	2.08495	0.000279718	0.000129564
+ L118W	52.38	40.8	45.73	46.3033	3.35513	0.00369901	0.000183753
+ L218W	3.976	3.885	5.316	4.39233	0.46258	1.45602e-05	0.00404096
L84W/L118W	53.4	58.2	65.7	59.1	3.57911	0.0414837	8.79168e-05
dKO AQP2/3	69.32	52.1	77.62	66.3467	7.5155	1	0.000954927
+AQP2	0.98	1.02	0.51	0.836667	0.163741	0.000954927	1
+L84M	0.2592	0.4469	0.5773	0.4278	0.0923228	0.00093184	0.0952638
+L118M	39.02	39.52	24.19	34.2433	5.02874	0.0237947	0.00267052
+L218M	0.2832	0.3357	1.261	0.626633	0.317545	0.000945651	0.588203

## Sheet: Fig. 4B
Pentamidine transport rates expressed as % of TbAQP2WT
	Values in pmol/10E7 cells/s
	exp
	AQP001	AQP002	AQP003	AQP004	AQP006	AQP007	AQP008	AQP009	AQP010	AQP011	AQP012	AQP013	AQP014	AQP015	AQP016	AQP017	AQP018	AQP023	AVG	SEM	n	ttest vs WT
+AQP2-WT	0.00495	0.01332	0.004133	0.004839	0.0402	0.02718	0.02059	0.02367	0.04246	0.02929	0.03811	0.005972	0.009128	0.006516	0.04335	0.01646	0.01277	0.03905	0.0212216	0.00342413	18
AQP2/3-dKO	4.66e-05	0.000261	6.595e-06	3.355e-06	0.0006115	0.0001785	0.000301	ND	0.0003271	0.0005043	0.0003812	ND	7.4e-05	5.783e-05	0.0006005	0.0002457	0.0001777	0.0004007	0.000276427	5.52336e-05	16
AQP2 mutants
L218W					0.003558	0.001035	0.001683	0.002098											0.0020935	0.000534923	4	0.00101548
L118W					0.0009663	0.0004885	0.0002655		0.0006798	0.0007498	0.0006196								0.00062825	9.71085e-05	6	2.67102e-06
L84W					0.0009453	0.0001276	0.0007638		0.0008442	0.0006329									0.00066276	0.000143221	5	3.87028e-05
L84W/118W									0.0001102	0.0007291	5.61e-05								0.000298467	0.000215882	3	0.000725365
L84M												0.002362	0.004972	0.00342					0.00358467	0.000757927	3	0.0426609
L118M												0.000589	0.000736	0.0006552					0.000660067	4.2505e-05	3	0.00256331
L218M												0.002377	0.00699	0.004469					0.004612	0.00133358	3	0.191424
	values are percent of +AQP2-WT
	exp
	AQP001	AQP002	AQP003	AQP004	AQP006	AQP007	AQP008	AQP009	AQP010	AQP011	AQP012	AQP013	AQP014	AQP015	AQP016	AQP017	AQP018	AQP023	AVG	SEM	n	ttest vs 2/3 dKO
+AQP2-WT	100	100	100	100	100	100	100	100	100	100	100	100	100	100	100	100	100	100	100	0	18
AQP2/3-dKO	0.941414	1.95946	0.159569	0.0693325	1.52114	0.656733	1.46187		0.770372	1.72175	1.00026		0.810692	0.887508	1.38524	1.49271	1.39154	1.02612	1.07848	0.131782	16
AQP2 mutants
L218W					8.85075	3.80795	8.17387	8.86354											7.42403	1.21607	4	0.0233453
L118W					2.40373	1.79728	1.28946		1.60104	2.55992	1.62582								1.87954	0.202862	6	0.0287323
L84W					2.35149	0.469463	3.70957		1.98822	2.16081									2.13591	0.515866	5	0.0940151
L84W/L118W									0.259538	2.48925	0.147205								0.96533	0.762648	3	0.81923
L84M												39.5512	54.4698	52.4862					48.8357	4.67743	3	0.00415622
L118M												9.86269	8.0631	10.0552					9.32701	0.634396	3	2.19779e-14
L218M												39.8024	76.5776	68.585					61.655	11.1672	3	0.0243593
	Summary table
				ttest
	AVG	SEM	n	vs dKO	vs WT
+AQP2-WT	100	0	18
AQP2/3-dKO	1.07848	0.131782	16
AQP2 mutants
L218W	7.42403	1.21607	4	0.0233453	0.00101548
L118W	1.87954	0.202862	6	0.0287323	2.67102e-06
L84W	2.13591	0.515866	5	0.0940151	3.87028e-05
L84W/L118W	0.96533	0.762648	3	0.81923	0.000725365
L84M	48.8357	4.67743	3	0.00415622	0.0426609
L118M	9.32701	0.634396	3	2.19779e-14	0.00256331
L218M	61.655	11.1672	3	0.0243593	0.191424

## Sheet: Fig. 4C
Alamar blue EC50 values of mutants expressed in the aqp1-3 null cell line
AQP2 W.T and all mutants expressed in KO-AQP1-3 cell line (all in aqp1-3 triple KO)
Values in nM						ttest	ttest
Pentamidine	Repeat 1	Repeat 2	Repeat 3	MEAN	SEM	vs KO 1-3	vs AQP2WT
KO AQP1-3	68.68	75.42	63.91	69.3367	3.33883	1	3.66459e-05
+AQP2 W.T	0.5555	0.2917	2.438	1.09507	0.675771	3.66459e-05	1
+L84W	14.417	18.659	15.25	16.1087	1.29764	0.000119442	0.000508455
+ L118W	26.91	27.11	25.75	26.59	0.42395	0.000221348	5.71435e-06
+ L218W	3.976	3.885	5.316	4.39233	0.46258	4.27681e-05	0.0157817
+ L84W/L118W	53.44	58.24	65.72	59.1333	3.57296	0.105247	9.00853e-05
+L84M	0.6452	0.7792	0.8903	0.771567	0.0708571	3.32408e-05	0.65884
+L118M	26.79	27.79	29.4	27.9933	0.76027	0.000269905	1.21544e-05
+L218M	0.2832	0.3357	1.261	0.626633	0.317545	3.35277e-05	0.564448

## Sheet: Fig. 4D
EC50 values for the TAO inhibitor SHAM
Values in μM						ttest	ttest
SHAM	Repeat 1	Repeat 2	Repeat 3	MEAN	SEM	vs KO 1-3	vs AQP2WT
KO AQP1-3	7.384	7.929	8.39	7.901	0.251792	1	1.70608e-05
+AQP2 W.T	18.45	18.09	19.21	18.5833	0.28589	1.70608e-05	1
+L84W	11.25	13.72	14.58	13.1833	0.864325	0.00707335	0.00680585
+ L118W	10.4	11.09	10.92	10.8033	0.179745	0.00124823	3.72391e-05
+ L218W	14.65	16.29	16.85	15.93	0.571664	0.000370632	0.0228581
+ L84W/L118W	11.72	12.34	12.6	12.22	0.226053	0.000380864	0.000111518
+L84M	17.55	17.65	19.06	18.0867	0.422207	5.66935e-05	0.446408
+L118M	10.88	12.25	11.35	11.4933	0.348078	0.00192974	0.000167706
+L218M	15.76	12.72	17.12	15.2	1.12641	0.00541078	0.065267

## Sheet: Fig. 4E
Glycerol uptake in tbaqp1-3 null cell lines
	Values in dpm
	exp						ttest VS
	HK1560 (R1)	HK1560 (R2)	HK1560 (R3)	AVG	SEM	n	+ AQP2 WT	KO AQP1-3
triple KO AQP1-3	3439.75	3689.75	2430	3186.5	385.073	3		3.13169e-05
+ AQP2 WT	18422.5	20668	20323.5	19804.7	698.202	3	3.13169e-05
AQP2 mutants
L84W	10224.8	13226	9416	10955.6	1158.97	3	0.00282462	0.00313005
L84M	13178.7	16239.5	17336.5	15584.9	1244.09	3	0.0416419	0.000679634
L118W	6704.25	6779.5	6612.25	6698.67	48.3616	3	4.78785e-05	0.000826164
L118M	11510.3	10303	2818.5	10906.7	603.667	2	0.0210889	0.00140651
L218W	13962.8	12032	15866.5	13953.8	1106.93	3	0.011069	0.000779641
L218M	15802.2	12393	16849	15014.8	1345.25	3	0.0341739	0.00107304
L84W/L118W	4801.5	4646.75	3099.5	4182.58	543.381	3	6.04242e-05	0.209074
	values are percent of + AQP2 WT
	exp						ttest VS
	HK1560 (R1)	HK1560 (R2)	HK1560 (R3)	AVG	SEM	n	+ AQP2 WT	KO AQP1-3	W/M
+ AQP2 WT	100	100	100	100	0	3		2.41984e-06
triple KO AQP1-3	18.6715	17.8525	11.9566	16.1602	2.11504	3	2.41984e-06
AQP2 mutants
L84W	55.5014	63.9926	46.3306	55.2749	5.09985	3	0.000932047	0.00209549	0.0230133
L84M	71.5357	78.5732	85.3027	78.4705	3.97453	3	0.00562872	0.000158002
L118W	36.3916	32.8019	32.535	33.9095	1.24345	3	7.50043e-07	0.00193715	0.0207969
L118M	62.4798	49.85		56.1649	6.31487	2	0.0201287	0.00520113
L218W	75.7918	58.2156	78.0697	70.6924	6.27295	3	0.00950372	0.00118425	0.620271
L218M	85.7769	59.9623	82.904	76.2144	8.16828	3	0.0435931	0.00205953
L84W/L118W	26.0632	22.4828	15.2508	21.2656	3.18006	3	1.57952e-05	0.252257

## Sheet: Figure 4-figure supplement 1
	All EC50 values with the L-->M mutations (nM)										ttest			All EC50 values with the L-->M mutations (nM)													All EC50 values with the L-->M mutations (nM)
	Cymelarsan	repeat 1	repeat 2	repeat 3	repeat 4	repeat 5	repeat 6	MEAN (nM)	STDEV	SEM	vs AQP-KO	vs +AQP2WT		Diminazene	repeat 1	repeat 2	repeat 3	repeat 4	repeat 5	repeat 6	MEAN (nM)	STDEV	SEM	vs AQP-KO	vs +AQP2WT		PAO	repeat 1	repeat 2	repeat 3	repeat 4	repeat 5	repeat 6	MEAN (nM)	STDEV	SEM	vs AQP-KO	vs +AQP2WT
	AQKO	32.54	34.82	30.17	17.49	16.06	15.97	32.51	2.32515	1.16257	1	0.000497991		AQKO	163.7	190.5	170.1	44.99	82.68	48.2	174.767	13.9962	6.99809	1	0.787281		AQKO	3.829	3.839	3.613	3.358	2.44	1.697	3.76033	0.127692	0.0638462	1	0.59085
	+AQP2	7.74	8.039	7.28	3.552	3.462	2.473	7.68633	0.382335	0.191168	0.000497991	1		+AQP2	148.7	144.1	154.6	72.51	82.41	42.87	149.133	5.2634	2.6317	0.787281	1		+AQP2	3.593	4.047	3.563	1.777	2.351	1.592	3.73433	0.271192	0.135596	0.59085	1
	+L84M	14.71	14.53	12.37	13.67	10.46	17.08	13.87	1.30215	0.651076	0.0171016	0.000119371		+L84M	123.3	155.4	157.7	73.35	83.32	47.3	145.467	19.2313	9.61566	0.766265	0.976771		+L84M	3.979	3.734	3.777	2.913	2.946	2.709	3.83	0.130817	0.0654083	0.622117	0.303514
	+L118M	34.46	35.56	32.89	24.6		24.351	34.3033	1.34188	0.670938	0.232898	3.43185e-06		+L118M	169.9	175.8	186.4	49.88	68.62	32.85	177.367	8.36082	4.18041	0.944932	0.858074		+L118M	4.124	5.162	4.061	1.634	1.676	0.8764	4.449	0.618279	0.30914	0.799767	0.904783
	+L218M	11.42	11.34	10.93	12.35	12.36	15.78	11.23	0.262869	0.131434	0.00833275	0.00025389		+L218M	38.71	61.53	61.89	39.11	34.75	41.56	54.0433	13.2803	6.64014	0.0270878	0.0120383		+L218M	3.684	3.845	3.061	0.6337	1.259	1.759	3.53	0.414066	0.207033	0.274325	0.534444
	All EC50 values with the L-->M mutations (% of aqp2/aqp3 null)										ttest			All EC50 values with the L-->M mutations (% of aqp2/aqp3 null)													All EC50 values with the L-->M mutations (% of aqp2/aqp3 null)
	Cymelarsan	repeat 1	repeat 2	repeat 3	repeat 4	repeat 5	repeat 6	MEAN (% KO)	STDEV	SEM	vs AQP-KO	vs +AQP2WT		Diminazene	repeat 1	repeat 2	repeat 3	repeat 4	repeat 5	repeat 6	MEAN (% KO)	STDEV	SEM	vs AQP-KO	vs +AQP2WT		PAO	repeat 1	repeat 2	repeat 3	repeat 4	repeat 5	repeat 6	MEAN (% KO)	STDEV	SEM	vs AQP-KO	vs +AQP2WT
	AQKO	100.092	107.106	92.8022	105.957	97.294	96.7488	100	5.58007	2.27805	1	4.89626e-11		AQKO	93.6677	109.002	97.3298	76.7442	141.036	82.2198	100	23.1049	9.43255	1	0.940687		AQKO	101.826	102.092	96.0819	134.41	97.6651	67.9253	100	21.1723	8.64354	1	0.294474
	+AQP2	23.8081	24.7278	22.3931	21.5186	20.9733	14.9818	21.4004	3.44233	1.40533	4.89626e-11	1		+AQP2	85.0849	82.4528	88.4608	123.688	140.575	73.1279	98.8983	26.78	10.9329	0.940687	1		+AQP2	95.55	107.623	94.7522	71.1274	94.1027	63.7225	87.8131	16.726	6.82835	0.294474	1
	+L84M	45.2476	44.6939	38.0498	82.815	63.3683	103.473	62.9413	25.7045	10.4938	0.00621482	0.00284977		+L84M	70.5512	88.9186	90.2346	125.121	142.128	80.6846	99.6063	27.7969	11.348	0.979237	0.965049		+L84M	105.815	99.2997	100.443	116.598	117.919	108.432	108.084	7.87423	3.21464	0.401245	0.0228582
	+L118M	105.998	109.382	101.169	149.031		147.522	122.62	23.6079	10.5578	0.0474035	2.41388e-06		+L118M	97.2153	100.591	106.656	85.0856	117.052	56.0357	93.7728	21.2877	8.69066	0.637767	0.721271		+L118M	109.671	137.275	107.996	65.4036	67.0847	35.0794	87.0849	37.5263	15.32	0.479677	0.966229
	+L218M	35.1277	34.8816	33.6204	74.8183	74.8788	95.5977	58.1541	26.9561	11.0048	0.00395194	0.00784111		+L218M	22.1495	35.2069	35.4129	66.7141	59.2767	70.8933	48.2756	19.9568	8.14733	0.00198035	0.00402292		+L218M	97.97	102.252	81.4024	25.3649	50.3936	70.4069	71.2982	29.3913	11.999	0.0809632	0.259203
	All EC50 values with the L-->W mutations (nM)										ttest			All EC50 values with the L-->W mutations (nM)										ttest													ttest
	Cymelarsan	repeat 1	repeat 2	repeat 3	repeat 4	repeat 5	repeat 6	MEAN	STDEV	SEM	vs AQP-KO	vs +AQP2WT		Diminazene	repeat 1	repeat 2	repeat 3	repeat 4	repeat 5	repeat 6	MEAN	STDEV	SEM	vs AQP-KO	vs +AQP2WT		PAO	repeat 1	repeat 2	repeat 3	repeat 4	repeat 5	repeat 6	MEAN	STDEV	SEM	vs AQP-KO	vs +AQP2WT
	AQKO	18.41	20.04	21.35				19.9333	1.4729	0.73645	1	5.40442e-05		AQKO	68.8	84.13	75.13				76.02	7.70365	3.85183		0.404875		AQKO	2.014	2.017	1.287				1.77267	0.420602	0.210301	1	0.384245
	+AQP2-WT	3.601	2.262	3.017				2.96	0.671317	0.335659	5.40442e-05	1		+AQP2-WT	81.62	74.65	66.21				74.16	7.71668	3.85834	0.0158071			+AQP2-WT	1.936	0.9932	1.31				1.41307	0.479776	0.239888	0.384245	1
	+L84W	20.65	20.6	18.83				20.0267	1.03665	0.518323	0.932797	1.80712e-05		+L84W	96.44	95.52	66.39				86.1167	17.09	8.54499	0.271619	0.818099		+L84W	2.042	1.136	1.586				1.588	0.453003	0.226502	0.632155	0.669945
	+ L118W	17.68	24.88	12.54				18.3667	6.19859	3.0993	0.692092	0.0128476		+ L118W	90.02	77.43	51.07				72.84	19.8765	9.93827	0.0931451	0.472437		+ L118W	1.897	1.946	1.142				1.66167	0.450711	0.225355	0.770723	0.548737
	+ L218W	19.96	22.68	13.58				18.74	4.67106	2.33553	0.694711	0.0044174		+ L218W	41.74	36.06	11.12				29.64	16.2883	8.14415	0.00256169	0.00915504		+ L218W	1.98	1.928	1.051				1.653	0.521995	0.260998	0.772613	0.589252
	All EC50 values with the L-->W mutations (% of aqp2/aqp3 null)										ttest			All EC50 values with the L-->W mutations (% of aqp2/aqp3 null)										ttest			All EC50 values with the L-->W mutations (% of aqp2/aqp3 null)										ttest
	Cymelarsan	repeat 1	repeat 2	repeat 3	repeat 4	repeat 5	repeat 6	MEAN	STDEV	SEM	vs AQP-KO	vs +AQP2WT		Diminazene	repeat 1	repeat 2	repeat 3	repeat 4	repeat 5	repeat 6	MEAN	STDEV	SEM	vs AQP-KO	vs +AQP2WT		PAO	repeat 1	repeat 2	repeat 3	repeat 4	repeat 5	repeat 6	MEAN	STDEV	SEM	vs AQP-KO	vs +AQP2WT
	AQKO	92.3579	100.535	107.107				100	7.38913	3.69456	1	5.40442e-05		AQKO	90.5025	110.668	98.8293				100	10.1337	5.06686	1	0.782347		AQKO	113.614	113.783	72.6025				100	23.7271	11.8635	1	0.384245
	+AQP2-WT	18.0652	11.3478	15.1355				14.8495	3.36781	1.68391	5.40442e-05	1		+AQP2-WT	107.366	98.1978	87.0955				97.5533	10.1509	5.07543	0.782347	1		+AQP2-WT	109.214	56.0286	73.9				79.7142	27.0652	13.5326	0.384245	1
	+L84W	103.595	103.344	94.4649				100.468	5.20056	2.60028	0.932797	1.80712e-05		+L84W	126.861	125.651	87.3323				113.282	22.4809	11.2405	0.403689	0.331373		+L84W	115.194	64.0842	89.4697				89.5825	25.5549	12.7775	0.632155	0.669945
	+ L118W	88.6957	124.816	62.9097				92.1405	31.0966	15.5483	0.692092	0.0128476		+ L118W	118.416	101.855	67.1797				95.8169	26.1465	13.0732	0.808864	0.919771		+ L118W	107.014	109.778	64.4227				93.7382	25.4256	12.7128	0.770723	0.548737
	+ L218W	100.134	113.779	68.1271				94.0134	23.4334	11.7167	0.694711	0.0044174		+ L218W	54.9066	47.4349	14.6277				38.9897	21.4263	10.7132	0.0111739	0.0128651		+ L218W	111.696	108.763	59.2892				93.2493	29.4469	14.7234	0.772613	0.589252

## Sheet: Figure 4-figure supplement 2
Strain	EC50		Transport rate
	AVG	SEM	AVG	SEM
2T1	5.52	1.65	21.86	2.34
AQKO	100	0	1.05	0.16
+AQP2-WT	0.46	0.27	100	0
+L264R	126.1	10.2	0.91	0.28
+L258Y	0.5	0.24	5.4	1.6
+S131P/S263A	1.92	1.53	6.48	1.39
+I190T/W192G	99.52	16.4	1.27	0.4
+ I190T	6.89	2.28	2.728	0.744
+AQP2 I110W	118.7	11	0.673	0.296
+AQP3 WT	105.7	12.6	0.48	0.1
+AQP3 W102I/R256L	83.83	7.7	0.7	0.18
+AQP3 W102I/Y250L/R256L	31.94	4.25	1.13	0.1
+L218W	4.4	0.45	6.94	1.58
+L118W	46.3	3.36	1.83	0.32
+L84W	31.98	2.08	2.18	0.52
+L84W/L118W	59.1	3.58	0.97	0.76
+L84M	0.43	0.09	48.84	4.68
+L118M	34.24	5.03	9.33	0.63
+L218M	0.63	0.34	61.65	11.17
