# Supplementary material for: Positively selected modifications in the pore of TbAQP2 allow pentamidine to enter Trypanosoma brucei
Source: eLife. 2020 Aug 11;9:e56416. doi: 10.7554/eLife.56416 (PMC7473772; doi:10.7554/eLife.56416)
Supplement: Figure 5—source data 1. [file elife-56416-fig5-data1.xlsx]

## Sheet: Fig. 5A
Relative mRNA abundance
qRT-PCR							ttest
Cell line	Repeat 1	Repeat 2	Repeat 3	MEAN	STDEV	SEM	vs - Tet
CRK12 - Tet	1	1	1	1	0	0
CRK12 + Tet	0.547367	0.612473	0.582205	0.580682	0.03258	0.01629	2.39736e-05

## Sheet: Fig. 5B
	pentamidine uptake rate
	pmol/1E7 cells/s-1
exp number	CRK-tet	CRK+tet	% of control
AQP-PENTA029	0.008302	0.00804	96.8441
AQP-PENTA034	0.004089	0.004193	102.543
AQP-PENTA036	0.008758	0.006636	75.7707
AQP-PENTA037	0.005086	0.004619	90.8179
AVERAGE	0.00655875	0.005872	91.494
SEM	0.0011599	0.00089782	5.76189
T-test (+/- tet)			0.257725

## Sheet: Fig. 5C
	suramin uptake rate
	pmol/1E7 cells/s-1
exp number	CRK-tet	CRK+tet	% of control
HK1534	0.000492333	0.0003125	63.4733
HK1534	0.000357167	0.0002775	77.6948
HK1541	0.000635	0.000395167	62.231
HK1542	0.000638667	0.000434333	68.0063
HK1543	0.000492333	0.0003125	63.4733
AVERAGE	0.0005231	0.0003464	66.9757
SEM	5.25853e-05	2.92883e-05	2.85489
T-test (+/- tet)			0.0188352

## Sheet: Fig. 5-figure supplement 1
Hours	CRK12+Tet	CRK12-Tet
0	100000	100000
4	300000	330000
8	600000	720000
12	1000000	1500000
16	650000	3000000
20	340000	5100000
24	200000	6200000
