# Supplementary material for: Positively selected modifications in the pore of TbAQP2 allow pentamidine to enter Trypanosoma brucei
Source: eLife. 2020 Aug 11;9:e56416. doi: 10.7554/eLife.56416 (PMC7473772; doi:10.7554/eLife.56416)
Supplement: Figure 6—source data 1. [file elife-56416-fig6-data1.xlsx]

## Sheet: Sheet1
Densitometry readings with Western blotting TbAQP2 turnover, normalised to 0 h.
	untreated			pentamidine treated
time (h)	replicate 1	replicate 2		replicate 1	replicate 2
0	100	100		100	100
1	91.5238	68.1221		26.7354	92.4357
3	102.571	60.134		59.1409	85.8548
6	64.6667	52.2203		50.2062	79.7655
