# Supplementary material for: Positively selected modifications in the pore of TbAQP2 allow pentamidine to enter Trypanosoma brucei
Source: eLife. 2020 Aug 11;9:e56416. doi: 10.7554/eLife.56416 (PMC7473772; doi:10.7554/eLife.56416)
Supplement: Figure 7—source data 1. [file elife-56416-fig7-data1.xlsx]

## Sheet: Fig. 7A
Effect of ionophores and NEM on pentamidine uptake in T. b. brucei s427 WT (bloodstream forms)
Expressed as percentage of the uninhibited control
Repeat	CCCP 0.25	CCCP 1	CCCP 5	CCCP 10	CCCP 20	Nigericin 1	Nigericin 5	Nigericin 10	Nigericin 20	Gramicidin 1	Gramicidin 5	Gramicidin 10	valinomycin 0.3	valinomycin 1	valinomycin 10	NEM 1000
1	101	34.6	8.8	3.6	3.2	108	79.4	63.9	41.7	35.3	1.3	4.5	108.9	97.7	86.7	56.77
2	112.1	39.1	5.9	3.5	9.2	110.7	47.9	61	44.5	26.9	2.4	3.1	103.8	84.2	73.5	56.26
3			12.3	7.1	2.5		103	53.2	42.9	17.4	7.3	10				67.13
4			14.1	3				66.7	48.7	13.5
AVG	106.55	36.85	10.275	4.3	4.96667	109.35	76.7667	61.2	44.45	23.275	3.66667	5.86667	106.35	90.95	80.1	60.0533
SEM	5.55	2.25	1.82683	0.942514	2.12629	1.35	15.9604	2.90947	1.52834	4.89734	1.84421	2.10581	2.55	6.75	6.6	3.54139

## Sheet: Fig. 7B
	pmol suramin accumulated in 10 minutes
						ttest
		exp	AVG pmol	Average	SEM	+suramin	+/-CCCP	% of no CCCP control
	no CCCP	HK1559	0.886855	0.874518	0.0434223	0.000717484	0.0295686
		HK161	0.793903
		HK163	0.942797
	+100 μM suramin	HK1559	0.204679	0.277379	0.0464849
		HK161	0.263544
		HK163	0.363914
	+CCCP	HK1559	0.458927	0.589369	0.0743108	0.00995419		67.3935
		HK161	0.592904
		HK163	0.716274
	+100 μM suramin	HK1559	0.140382	0.208784	0.0359569
		HK161	0.223759
		HK163	0.262209

## Sheet: Fig. 7C
		PMF		3H-penta		outlier
	Control	-95.4	1.3	100
	CCCP 20	-45.6	2.4	4.97*	2.13*	4.97	2.13
	gramicidin 10	-13.1	2.8	5.87	2.11
	Nigericin 20	-46.9	1.8	44.45	1.53
	NEM 1000	-39.3	4.6	56.52	0.25

## Sheet: Fig. 7D
Effect of pentamidine and CCCP on glycerol uptake in bloodstream form t. b. brucei s427WT
	log[inhibitor]	Pentamidine		CCCP
	-11	0.002246	3.04e-05	0.002246	3.04e-05	this is the zero inhibitor point
	-9.48149	0.002177	6.07e-05
	-9	0.002263	6.34e-05
	-8.48149	0.002143	2.23e-05
	-8	0.002105	3.03e-05
	-7.52288	0.00147	0.000107
	-7	0.000765	2.77e-05
	-6.48149	0.000111	0.000103
	-6.48149			0.002172	1.71e-05
	-6			0.002357	6.48e-05
	-5.48149			0.00208	5.94e-05
	-5			0.001512	9.39e-05
	-4.48149			0.000656	3.59e-05
	-4			0.000295	1.29e-05
	-3.60206	6.78e-20	1.84e-05

## Sheet: Fig. 7E
Effect of CCCP as an inhibitor on pentamidine uptake in bloodstreram forms of T. b. brucei s427
		Pentamidine		CCCP
	-11	0.01011	0.000211	0.01011	0.000211	this is the zero inhibitor point
	-9.48149	0.009352	0.000561
	-9	0.008545	0.000178
	-8.48149	0.008733	0.00025
	-8	0.007854	0.00024
	-7.52288	0.006394	6.62e-05
	-7	0.005102	0.000171
	-6.48149	0.001052	0.000219
	-6.48149			0.010596	0.000245
	-6			0.010028	0.000363
	-5.48149			0.01034	0.00098
	-5			0.007941	0.000506
	-4.48149			0.00483	7.28e-05
	-4			0.003012	0.000396
	-3.60206	-1.5e-19	0.000114
