# Supplementary material for: Positively selected modifications in the pore of TbAQP2 allow pentamidine to enter Trypanosoma brucei
Source: eLife. 2020 Aug 11;9:e56416. doi: 10.7554/eLife.56416 (PMC7473772; doi:10.7554/eLife.56416)
Supplement: Figure 9—source data 1. [file elife-56416-fig9-data1.xlsx]

## Sheet: Fig 9A
	Chainlength	Ki value
		Mean (μM)	SEM
	2	100		note: Ki >100, n=4
	3	7.2	2.23
	4	3.911	1.393
	5	0.0364	0.0064
	6	0.059	0.01
	7	0.125	0.009
	8	2.201	0.482

## Sheet: Fig. 9B
				distance	Ki value (μM)
					Mean	SEM
			propamidine	15.305	6.63	1.4
			butamidine	16.811	3.87	1.38
			pentamidine	17.824	0.035	0.005
			hexamidine	19.326	0.058	0.01
			heptamidine	20.367	0.123	0.01
			octamidine	21.867	2.16	0.48
			RT14	17.782	0.061	0.015
