# Supplementary material for: Positively selected modifications in the pore of TbAQP2 allow pentamidine to enter Trypanosoma brucei
Source: eLife journal article supplement (doi:10.7554/elife.56416), 2020-08-07
Supplement: supp [file elife_poa_e56416_Figure_1_figure_supplement_2.docx]

>Tco AQP1

MTSPTVPNPMSTVPMTEMTEANGTTNPPIPDAGERTAVNFDTEQCKTKEILAGEGEAPHGPMDINYWPLRNLRMDFREYVGEFLGTFVLLFMGNGVVATTLLDNNLGFLSITFGWGIAVTMGLYVSLGTSSGHLNPAVTVANAFFGGFPWKKVPGYIAMQMLGAFVGAACAYGVYADLLNKKVSDGEIEDYAGMFSTYPRDGNSLFSCIFGEFICTAMLTFCVCGIFDTHNAPATGHEPLAVGALVFAIGNNVGYATGYAINPARDFGPRVFSAILYGSTVFTRGDYYFWVPLFIPLLGGIFGIILYKYFVPH

>Tbr AQP1

MSDEKINVHQYPSETDVRGLKARNGGACEVPFEENNEPIPNRSANPQEKNENELVGDNADNEAHDAVDVNYWAPRQLRLDYRNYMGEFLGTFVLLFMGNGVVATTILDKDLGFLSITLGWGIAVTMGLYISLGISCGHLNPAVTLANAVFGCFPWRRVPGYIAAQMLGAFVGAACAYGVYADLLKQHSGGLVGFGDKGFAGMFSTYPREGNRLFYCIFSEFICTAILLFCVGGIFDPNNSPAKGHEPLAVGALVFAIGNNIGYASGYAINPARDFGPRVFSAILFGSEVFTTGNYYFWVPLFIPFLGGIFGLFLYKYFVPY

>Tbr AQP2

MQSQPDNVAYPMELQAVNKDGTVEVRVQGNVDNSSNERWDADVQKHEVAEAQEKPVGGINFWAPRELRLNYRDYVAEFLGNFVLIYIAKGAVITSLLVPDFGLLGLTIGIGVAVTMALYVSLGISGGHLNSAVTVGNAVFGDFPWRKVPGYIAAQMLGTFLGAACAYGVFADLLKAHGGGELIAFGEKGIAWVFAMYPAEGNGIFYPIFAELISTAVLLLCVCGIFDPNNSPAKGYETVAIGALVFVMVNNFGLASPLAMNPSLDFGPRVFGAILLGGEVFSHANYYFWVPLVVPFFGAILGLFLYKYFLPH

>Tbr AQP3

MQSQPDNVAYPMELQAVNKDGTVEVRVQGNDDSSNRKHEVAEAQEEVPGGINFWAPRELRLNYRDYMGELLGTFVLLFMGNGVVATVIIDGKLGFLSITLGWGIAVTMALYVSLGISSGHLNPAVTVGNAVFGDFPWRKVPGYIAAQMLGAFLGAACAYGVFADLLKAHGGGELIAFGEKGTAGVFSTYPRDSNGLFSCIFGEFICTAMLLFCVCGIFDPNNSPAKGHEPLAVGALVFAIGNNIGYSTGYAINPARDFGPRVFSSFLYGGKVFSHANYYFWVPLVIPLFGGIFGLFLYKYFVPH

>Tsu AQP1

MSSEPVNVHRYTAEGDRSGLKDRHGKTCEVCVGDESAAAVPSAVYNPQEQSGDGPEVKAGGGEAEVQNAADVNNWAPRRLRLDYRDYMGEFLGTFVLLFMGNGVVATTMLDDGLGFLSITLGWGIAVTMGLYISLGTSCGHLNPAVTVANAVFGCFPWKKVAGYIAMQMLGAFVGAACAYGVFADLLKQHSGGLIPFGDKGFAGMFSTYPRDGNRLFYCIFGEFICTAMLLFCVSGIFDANNSPAKGHEPLAVGALVFAIGNNIGYATGYAINPARDFGPRLFSAILFGSEVFTAGNYYFWVPLFIPFLGGIFGLLLYKYFVPH

>Tsu AQP2

MQNQPDAMTHSTAVQMVNKNPEDGTGGADTERSDEMTAPTTRTGDAQKCETTNTPKEGAGGINYWAPRELRLKYRDYMGELLGTFVLLLMGNGVVATVVVDGKLGFLSITLGWGIAVTMALYISLGISSGHLNPAVTVGNAVFGDFPWRKVPGYIAAQMFGAFLGAACAYGVFADLLKEYCGGKLLAFGAKGIAGVFSTYPKEANSVFACVFGEFICTAILLFCVCGIFDPNNSPAKKHEPLAVGSLIFAIGNNIGYSTGYAMNPARDFAPRVFSALLLGGEVFSHGNYYFWVPLFIPFLGAIFGLFLYKYFVPH

**Figure 1-figure supplement 2**. The ratio of non-synonymous v synonymous (dN/dS) codon changes calculated for selected comparisons between *T. brucei* and *T. suis* AQPs. The ratios were calculated using a region of high confidence alignments from ~amino acid 60 (highlighted in Figure 1-figure supplement 1) to the C-terminus.
