# Supplementary material for: Positively selected modifications in the pore of TbAQP2 allow pentamidine to enter Trypanosoma brucei
Source: eLife. 2020 Aug 11;9:e56416. doi: 10.7554/eLife.56416 (PMC7473772; doi:10.7554/eLife.56416)
Supplement: Supplementary file 1. [file elife-56416-supp1.xlsx]

## Sheet: Sheet1
		HAPT Ki (μM)			ΔG0	δ(ΔG0)
		AVG	SEM	n	(kJ/mol)	(kJ/mol)	source	descriptor	reference
	Flexible diamidine series
1	ethamidine	>100		4		>19.7	Paul O'Neill		New synthesis, see Supplementary data
2	propamidine	6.63	1.4	8	-29.5586	12.9996	Paul O'Neill; Rhone Poulenc		De Koning, 2001
3	butamidine	3.87	1.38	4	-30.8932	11.665	Alan Fairlamb/May&Baker; Paul O'Neill
4	pentamidine	0.035	0.005	4	-42.5582	0	Sigma - Aldrich
5	hexamidine	0.058	0.01	3	-41.3061	1.2521	Alan Fairlamb/May&Baker
6	heptamidine	0.123	0.01	3	-39.4426	3.11562	Alan Fairlamb/May&Baker
7	octamidine	2.16	0.48	3	-32.3387	10.2195	Alan Fairlamb/May&Baker
8	Meta-pentamidine RT40	64.2	17.9	4	-23.9304	18.6278	Richard Tidwell		Bakunova et al 2009a; compound 26
	Changed linker hetero-atoms
9	DB1699	16.6	2.1	3	-27.2835	15.2747	David Boykin	extra O in the middle of the pentamidine linker	Nunn et al 1995; Maciejewska et al., 2006
10	RT-48	2.01	0.86	3	-32.5172	10.041	Richard Tidwell	Sulphur for oxygen in the pentamidine linker	Bakunova et al 2009a; compound 62
11	RT-50	6.27	1.3	3	-29.697	12.8612	Richard Tidwell	N(H) for oxygen in the pentamidine linker	Bakunova et al 2009a; compound 64
12	RT-49	>150		3		>20.7	Richard Tidwell	SO2 for O in the pentamdine linker	Bakunova et al 2009a; compound 63
	Ring substitutions
13	RT-47	0.58	0.04	3	-35.5981	6.96007	Richard Tidwell	Ortho hydroxides	Bakunova et al 2009a; compound 56
14	RT-43	0.51	0.15	3	-35.917	6.64123	Richard Tidwell	meta chlorines	Bakunova et al 2009a; compound 44
	RT-44	16.7778	3.934	2	-27.3	15.2582	Richard Tidwell	meta nitros	Bakunova et al 2009a; compound 45
	RT-45	7.51598	0.137854	2	-29.2	13.3582	Richard Tidwell	meta methoxys	Bakunova et al 2009a; compound 46
15	RT-46	>100					Richard Tidwell	Meta amides	Bakunova et al 2009a; compound 55
16	RT-52	8.84	0.88	3	-28.8455	13.7127	Richard Tidwell	Meta pyridine nitrogen	Bakunova et al 2009b; compound 1
17	RT-53	NI, 250		3		>22	Richard Tidwell	Ortho ring nitrogen,	Bakunova et al 2009b; compound 6
	Amidine substitutions
18	RT-30	0.3	0.07	3	-37.2324	5.32584	Richard Tidwell	methylated on both amidines	Bakunova et al 2009a; compound 2
19	RT-32	0.4	0.08	3	-36.5192	6.03898	Richard Tidwell	imidazoline on both ends	Bakunova et al 2009a; compound 4
	Guanidinium compounds
20	FR39	41.7	15.2	3	-25.0001	17.5581	Christophe Dardonville	imidazoline on both ends	Ríos Martínez et al 2015
21	CRMI8	52.8	12.7	3	-24.4151	18.1431	Christophe Dardonville	(N)-methoxy-imidazoline on both ends	Ríos Martínez et al 2015
	Single amidines
22	CHI/1/69/1	2.33	0.48	3	-32.1509	10.4073	Paul O'Neill	butamidine lacking one amidine moiety	New synthesis, see Supplementary data
23	CHI/1/72/1	2.62	0.68	4	-31.8601	10.6981	Paul O'Neill	pentamidine, substituting one amidine for methyl	New synthesis, see Supplementary data
24	RT-36	0.43	0.07	3	-36.3399	6.21826	Richard Tidwell	pentamidine, substituting one amidine for amine	Bakunova et al 2009a; compound 10
25	RT-38	NI, 100		4			Richard Tidwell	propamidine, substituting one amidine for carboxylic acid	Bakunova et al 2009a; compound 16
26	4-hydroxybenzamidine	2890	1050	3	-14.4931	28.0651	Sigma - Aldrich
	Aliphatic
27	Synthalin sulphate	270	62	3	-20.3697	22.1886	Biomol (EA-137); Dardonville	diguanidinium-decane	Dardonville et al 2002
28	CD3	45.2	7.6	2	-24.8003	17.7579	Christophe Darconville	diguanidinium-nonane	Dardonville et al 2002
29	CD1/D	16.8	6.2	3	-27.2538	15.3044	Christophe Darconville	guanidinium-nonane	Dardonville et al 2002
	conjugated non-aromatic linker
30	diminazene aceturate	62.5	3.2	3	-23.997	18.5612	Sigma - Aldrich
31	stilbamidine	54.7852	3.22757	3	-24.3236	18.25	gift from Rhone-Poulenc		De Koning, 2001
	furan di-benzamidines
32	DB75	38.2	10.2	3	-25.2174	17.3408	David Boykin	Furamidine	Das and Boykin (1977)
33	DB607	18.1	1.9	3	-27.069	15.4892	David Boykin	DB75, substituting one amidine for methoxy	Lansiaux et al 2002; new synthesis, supplementary data
34	DB960	16.6	3.5	2	-27.2835	15.2747	David Boykin	DB75 analogue, substituting one benzamidine for N-methyl benzimidazoline	New synthesis, see Supplementary data
35	DB544	15.1	2.6	3	-27.5182	15.04	David Boykin	DB75 analogue with 3,4-dimethylfuran	Das et al (1977)
36	DB820	43.4	10.3	3	-24.9011	17.6571	David Boykin	DB75 analogue; one 3-position pyridine nitrogen	Ismail et al 2003
37	DB829	39.9	8	3	-25.1095	17.4487	David Boykin	DB75 analogue; two 3-position pyridine nitrogens	Ismail et al 2003
38	DB994	167	20	3	-21.5606	20.9976	David Boykin	DB75 with two 2-position pyridine nitrogens	Ismail et al 2003
39	DB1061	32.3	6	3	-25.6333	16.9249	David Boykin	DB75 with extra carbon in both benzamidines, breaking conjugation	New synthesis, see Supplementary data
40	DB1062	59.6	11.2	3	-24.1148	18.4435	David Boykin	DB1061 with imidazoline terminal instead of amidine	New synthesis, see Supplementary data
	other 5-membered ring linkers
41	ER1004	68.7	16	3	-23.7625	18.7957	Paul O'Neill	DB75 analgue with thiazole linker instead of furan	New synthesis, see Supplementary data
42	DB320	71.3	12.1	3	-23.6704	18.8878	David Boykin	DB75 analogue with 1-Me-pyrrole instead of furan	Das and Boykin 2003b
43	DB1213	0.72	0.17	3	-35.0621	7.49607	David Boykin	Db75 analogue with selenophene instead of furan	Munde et al 2014
44	DB1063	0.4	0.1	3	-36.5192	6.03898	David Boykin	As DB1061 but with thiophene linker	New synthesis, see Supplementary data
45	DB1064	3	0.82	3	-31.5244	11.0338	David Boykin	As DB1062 but with thiophene linker	New synthesis, see Supplementary data
46	DB686	0.29	0.11	3	-37.3164	5.2418	David Boykin	DB75 analogue; di-benz-guanidinium terminals and a thiophene linker	Gonzalez et al 2007
47	DB1077	13.8	3.1	3	-27.7414	14.8168	David Boykin	DB75 with a 2,4-thiophene instead of 2,5-furan linker	New synthesis, see Supplementary data
48	DB914	0.073	0.013	2	-40.7359	1.8223	David Boykin	DB75 analogue but linker is two furans instead of one	Werbovetz et al 2006
	di-benzofuramidines
49	RT-01	49	11	3	-24.6002	17.958	Richard Tidwell	CH2 linker, meta-angled amidines (4-amidine benzofuran)	Bakunova et al 2007; compound 1
50	RT-02	66.06	13.03	3	-23.8597	18.6986	Richard Tidwell	CH2 linker, 5-amidine benzofuran	Bakunova et al 2007; compound 4
51	RT-05	0.57	0.18	3	-35.6413	6.91695	Richard Tidwell	(CH2)2 linker 5-amidine benzofuran	Bakunova et al 2007; compound 8
52	RT-08	75	14	3	-23.545	19.0132	Richard Tidwell	(CH2)2 linker 6-amidine benzofuran	Bakunova et al 2007; compound 14
53	RT-10	36.6	13.4	3	-25.3235	17.2347	Richard Tidwell	(CH2)3 linker 5-amidine benzofuran	Bakunova et al 2007; compound 17
54	RT-12	14.3	3.6	3	-27.6532	14.905	Richard Tidwell	(CH2)3 linker mixed 5 and 6-amidine benzofurans	Bakunova et al 2007; compound 20
55	RT-13	16.1	4.9	3	-27.3593	15.1989	Richard Tidwell	(CH2)3 linker mixed 5 and 6-amidine benzofurans; imidazole ends	Bakunova et al 2007; compound 22
56	RT-14	0.061	0.015	3	-41.1811	1.37711	Richard Tidwell	(CH2)4 linker 5-amidine benzofuran	Bakunova et al 2007; compound 23
57	RT-18	0.26	0.09	4	-37.5871	4.9711	Richard Tidwell	(CH2)5 linker 5-amidine benzofuran	Bakunova et al 2007; compound 29
58	RT-24	0.12	0.03	3	-39.5038	3.05441	Richard Tidwell	(CH2)6 linker 5-amidine benzofuran	Bakunova et al 2007; compound 38
59	RT-26	0.34	0.07	3	-36.9221	5.63611	Richard Tidwell	(CH2)8 linker 5-amidine benzofuran	Bakunova et al 2007; compound 40
	Bis-phosphonium salts
60	AHI-43	9.2	1.3	3	-28.7465	13.8117	Christophe Dardonville		Taladriz et al 2012
61	CD38	5.2	0.9	3	-30.1609	12.3973	Christophe Dardonville		Taladriz et al 2012
62	CDIV31	>250		3			Christophe Dardonville		Luque-Ortega et al 2010; Taladriz et al 2012
63	AHI15	53	13	3	-24.4057	18.1525	Christophe Dardonville		Taladriz et al 2012
	Other trypanocides
64	Isometamidium	3.54	0.52	3	-31.1141	11.4441	Samorin, Merial	Phenanthridinium-benzamidine fusion	Eze et al 2019
65	Ethidium	97	17	3	-22.9074	19.6508	Sigma	Phenanthidinium	Sigma-Aldrich
66	Megazol	NE, 250					Michael Barrett	nitroheterocyclic	Enanga et al 2003
67	Curcumin	398	101	3	-19.4078	23.1505	Sigma
68	AS-HK014	568	151	3	-18.5261	24.0321	Apichart Suksamrarn	curcuminoid	Changtam et al., 2010
	miscelaneous
69	resazurin	155	30	3	-21.7455	20.8128	Sigma
70	phloretin	1.76	0.48	3	-32.8464	9.71179	Sigma	inhibitor of human Aquaporin 9
71	DAPI	26.4	5.8	3	-26.1333	16.4249	Sigma	4′,6-Diamidino-2-phenylindole
	References
	Bakunova Sm, Bakunov SA, Wenzler T, Barszcz T, Werbovetz KA, Brun R, Hall JE, Tidwell RR (2007) Synthesis and antiprotozoal activity of pyridyl analogues of pentamidine. J. Med. Chem. 50, 5807-5823
	Bakunova SM, Bakunov SA, Patrick DA, Kumar EV, Ohemeng KA, Bridges AS, Wenzler T, Barszcz T, Jones SK, Werbovetz KA, Brun R, Tidwell RR (2009a) Structure-activity study of pentamidine analogues as antiprotozoal agents. J. Med. Chem. 52, 2016-2023
	Bakunova SM, Bakuniv SA, Wenzler T, Barszcz T, Werbovetz , Brun R, Tidwell RR (2009b) Synthesis and antiprotozoal activity of pyridyl analogues of pentamidine. J. Med. Chem. 52, 4657-4667
	Eze AA, Igoli J, Gray AI, Skellern GG, De Koning HP (2019) The individual components of commercial isometamidium do not possess stronger trypanocidal activity than the mixture, nor bypass isometamidium resistance. Int. J. Parasitol. Drugs Drug Resist. 9, 54-58
	Enanga B, Ariyanayagam MR, Stewart ML, Barrett MP (2003) Activity of megazol, a trypanocidal nitroimidazole, is associated with DNA damage. Antimicrob. Agents Chemother. 47, 3368-3370
	Ríos Martínez CH, Nué Martínez JJ, Ebiloma GU, De Koning HP, Alkorta I, and Dardonville C (2015) Lowering the pKa of a bisimidazoline lead with halogen atoms results in improved activity and selectivity against Trypanosoma brucei in vitro. Eur. J. Med. Chem. 101:806-817
	Taladriz A, Healy A, Flores Pérez EJ, Herrero García V, Ríos Martínez C, Alkhaldi AAM, Eze AA, Kaiser M, Brun R, de Koning HP, Chana A, and Dardonville C (2012) Synthesis and structure-activity analysis of new phosphonium salts with potent activity against African trypanosomes. J Med Chem 55:2606-2622
	Das, B. P., Boykin, D. W. (1977) Synthesis and Antiprotozoal Activity of 2,5-Bis-(4-¬guanyl-phenyl)furans. J. Med. Chem. 20, 531-536
	Ismail MA, Brun R, Tanious F, Wilson WD, Boykin DW (2003) Synthesis and Anti-Protozoal Activity of Aza-Analogs of Furamidine. J. Med. Chem. 46, 4761-4769
	Werbovetz ,K., Tidwell, R.R., Boykin, D, W., Stephens, C. E., Ismail, M. A.. Wilson, W. D. Preparation of 5,5’-bis-(4-amidinophenyl)2,2’-bifurans and related compounds as antiprotozoals. Eur. Pat. Appl. EP 1726589 A2 20061129 (2006)
	Nunn CM, Jenkins TC, Neidle S (1994) Crystal structure gamma-oxapentamidine complexed with d(CGCGAATTCGCG)2 the effects of drug structure on DNA minor-groove recognition Eur. J. Biochem. 226,953-961
	Maciejewska D, Kazmierczak P, Zabinski J, Wolska I, Popsis S (2006) Pentamidine analogs: syntheses, structures in solid state by 13C CP/MAS NMR spectroscopy, and X-ray crystallography and their preliminary biological screening against human cancer. Monatshefte fuer Chemie 137, 1225-1240
	Das BP, Boykin DW (1977) Synthesis and Antiprotozoal Activity of 2,5-Bis-(4-¬guanyl-phenyl)furans. J. Med. Chem. 20, 531-536
	Lansiaux A, Dassoneville L, Facompre M, Kumar A, Stephens CE, Bajic M, Tanious F,Wilson WD, Boykin DW, Bailly C (2002) Distribution of furamidine analogues in tumor cells: Influence of the number of positive charges. J. Med. Chem. 45, 1994-2002
	Das BP, Boykin DW (1997b) Synthesis and Antiprotozoal Activity of 2,5-Bis(4-guanyl-phenyl)thiophenes and pyrroles. J. Med. Chem. 20, 1219-1221
	Gonzalez JL, Stephens CE, Wenzler T, Brun R, Tanious FA, Wilson WD, Barszc T, Werbovetz KA, Boykin DW (2007) Synthesis and Antiparasitic Evaluation of Bis-2,5-[4-guanidinophenyl]thiophenes, Eur. J. Med. Chem. 42, 552-557
	Ismail MA, Arafa RK, Brun R, Wenzler T, Miao Y, Wilson WD, Generaux C, Bridges A, Hall JE, Boykin DW (2006) Synthesis, DNA Affinity, and Antiprotozoal Activity of Linear Dications: Terphenyl Diamidines and Analogues. J. Med. Chem. 49, 5324-5332
	Arafa RK, Ismail MA, Munde M, Wilson WD, Wenzler T, Brun R, Boykin DW (2008) Novel Linear Triaryl Guanidines, N-Substituted Guanidines and Potential Prodrugs as Antiprotozoal Agents. Eur. J. Med. Chem. 43, 2901-2908
	Dardonville C, Rozas I, Callado LF, Meana JJ (2002) I(2)-imidazoline binding site affinity of a structurally different type of ligands. Bioorg. Med. Chem. 10 (5), 1525-1533
	Luque-Ortega JR, Reuther P, Rivas L, Dardonville C (2010) New Benzophenone-Derived Bisphosphonium Salts as Leishmanicidal Leads Targeting Mitochondria through Inhibition of Respiratory Complex II. J. Med. Chem. 53, 1788-1798.
